# Supplementary material for: Diffusion doping of cobalt in rod-shape anatase TiO2 nanocrystals leads to antiferromagnetism
Source: Royal Society of Chemistry journal article supplement (doi:10.1039/d0na00640h), 2020-01-01
Supplement: d0na00640h1.pdf [file d0na00640h1.pdf]

# Diffusion Doping of Cobalt in Rod-shape Anatase TiO<sub>2</sub> Nanocrystals Leads to Antiferromagnetism

Shahzahan Mia,<sup>1</sup> Shelton J. P. Varapragasam,<sup>1</sup> Aravind Baride,<sup>1</sup> Choumini Balasanthiran,<sup>2</sup> Balamurugan Balasubramanian,<sup>4</sup> Robert M. Rioux,<sup>2,3</sup> James D. Hoefelmeyer<sup>1\*</sup>

<sup>1</sup> Department of Chemistry, University of South Dakota, 414 E. Clark St., Vermillion, SD 57069, United States.

<sup>2</sup> Department of Chemical Engineering and <sup>3</sup> Department of Chemistry, The Pennsylvania State University, 22 Chemical Biomedical Engineering Building, University Park, Pennsylvania 16802-4400, United States.

<sup>4</sup> Nebraska Center for Materials and Nanoscience and Department of Physics and Astronomy, University of Nebraska, Lincoln, NE 68588-0299, United States.

\* corresponding author email: [jhoefelm@usd.edu](mailto:jhoefelm@usd.edu)

## Supporting information

### Table of Contents

|                                                                                                |        |
|------------------------------------------------------------------------------------------------|--------|
| Figure S1. TEM images of Co <sup>2+</sup> <sub>(surface)</sub> -TiO <sub>2</sub> .             | Page 2 |
| Figure S2. TEM images of Co <sup>2+</sup> <sub>(doped)</sub> -TiO <sub>2</sub> .               | Page 3 |
| Figure S3. <i>d</i> -spacing of TiO <sub>2</sub> with different cobalt-dopant percentage.      | Page 4 |
| Figure S4. Unit cell parameters of TiO <sub>2</sub> with different cobalt-dopant percentage.   | Page 4 |
| Figure S5. SEM images of prepared thin films with 2.83% cobalt doped TiO <sub>2</sub> nanorods | Page 5 |
| Figure S6. Film thickness versus number of deposition steps.                                   | Page 6 |

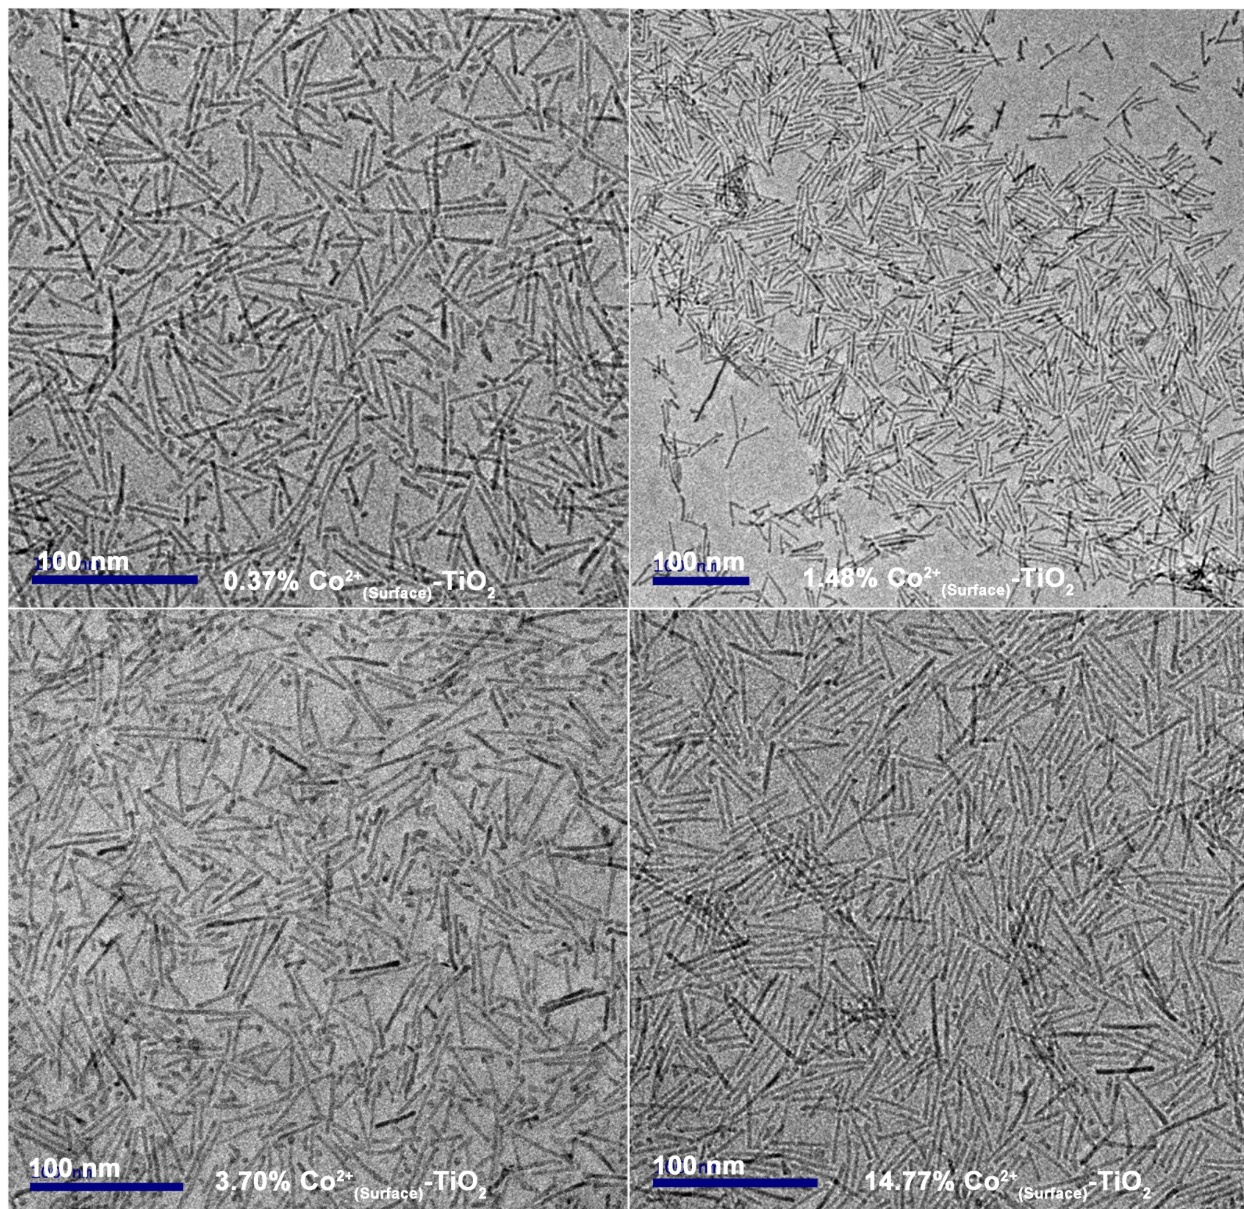

**Figure S1.** TEM images of  $\text{Co}^{2+}_{(\text{surface})}\text{-TiO}_2$ . Top left: 0.37%  $\text{Co}^{2+}_{(\text{surface})}\text{-TiO}_2$ . Top right: 1.48%  $\text{Co}^{2+}_{(\text{surface})}\text{-TiO}_2$ . Bottom left: 3.70%  $\text{Co}^{2+}_{(\text{surface})}\text{-TiO}_2$ . Bottom right: 14.77%  $\text{Co}^{2+}_{(\text{surface})}\text{-TiO}_2$ . All scale bars are 100 nm.



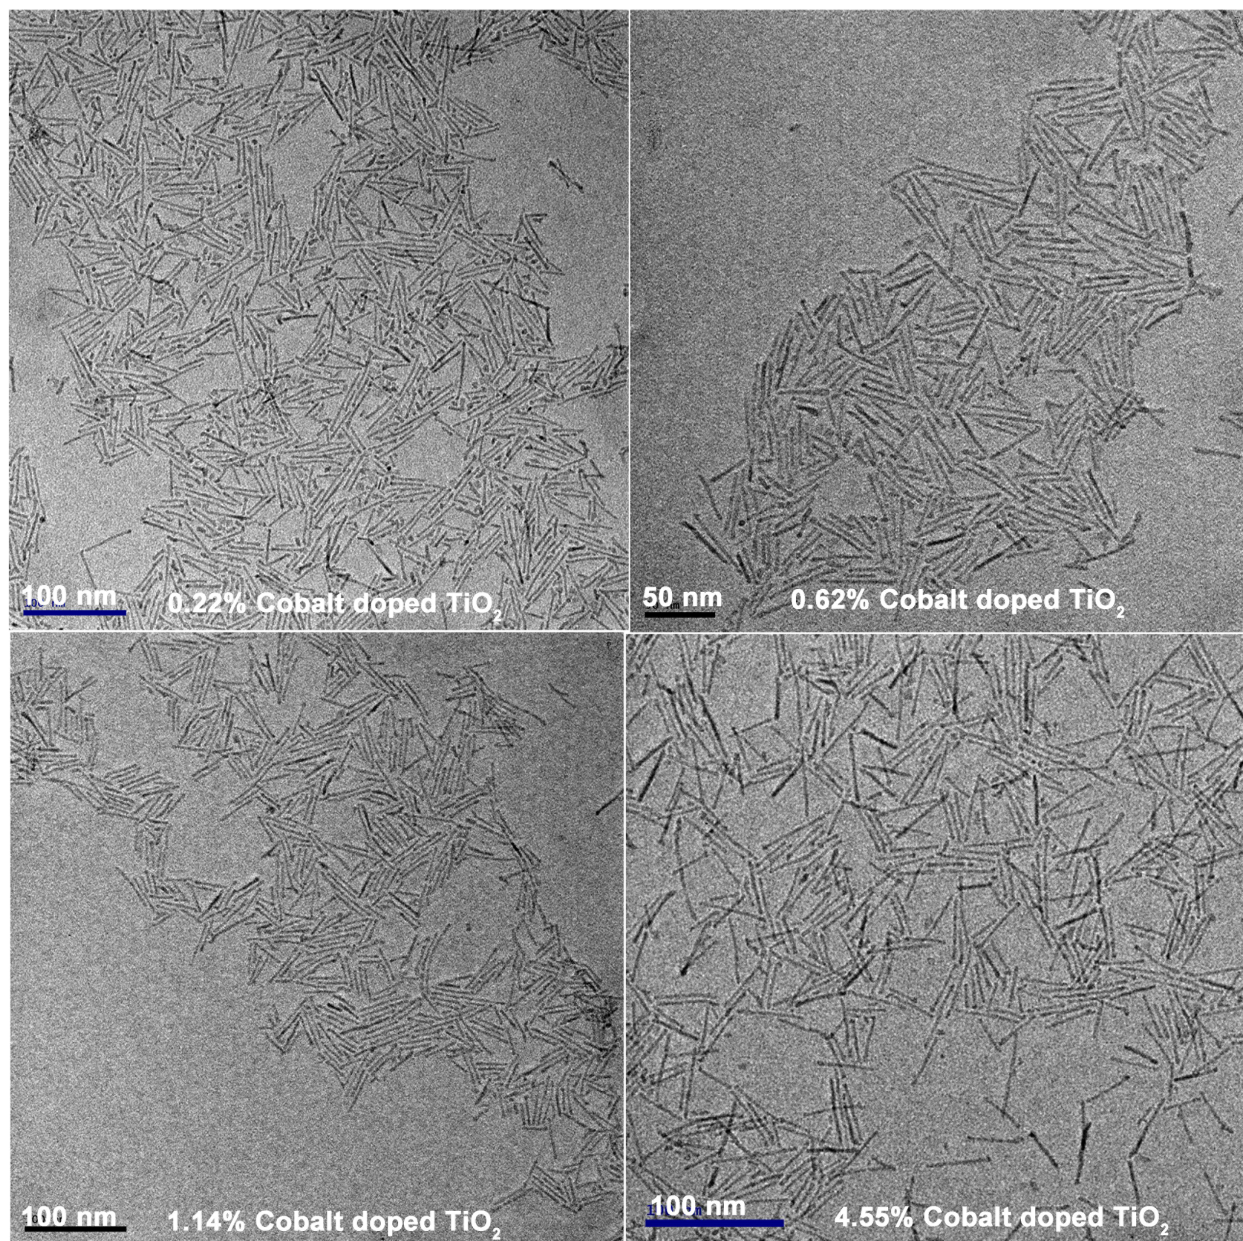

**Figure S2.** TEM images of  $\text{Co}^{2+}_{(\text{doped})}\text{-TiO}_2$ . Top left: 0.22%  $\text{Co}_{(\text{doped})}\text{-TiO}_2$ , scale bar = 100 nm. Top right: 0.62%  $\text{Co}_{(\text{doped})}\text{-TiO}_2$ , scale bar = 50 nm. Bottom left: 1.14%  $\text{Co}_{(\text{doped})}\text{-TiO}_2$ , scale bar = 100 nm. Bottom right: 4.55%  $\text{Co}_{(\text{doped})}\text{-TiO}_2$ , scale bar = 100 nm.



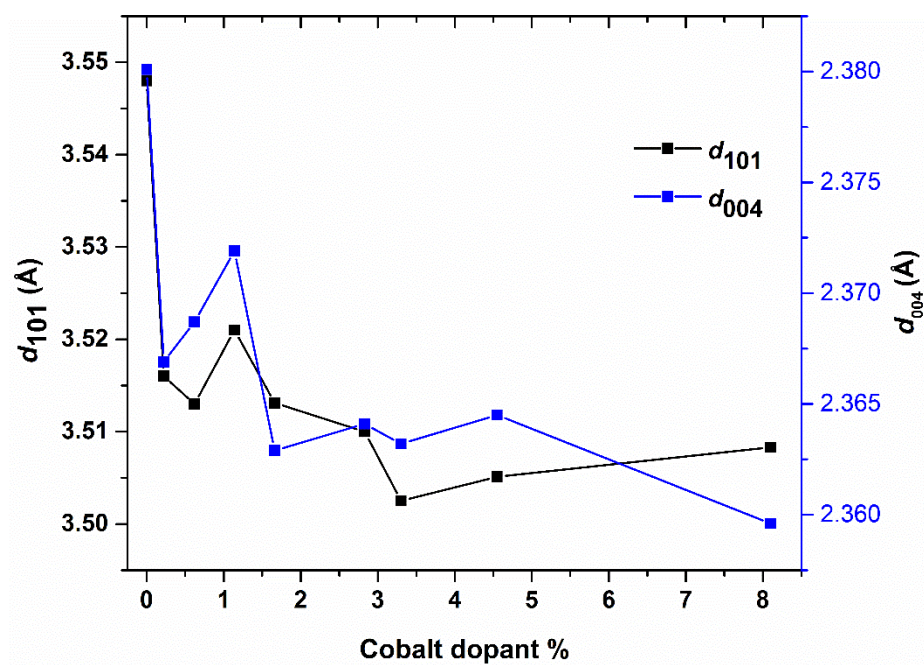

**Figure S3.** *d*-spacing of TiO<sub>2</sub> with different cobalt-dopant percentage.

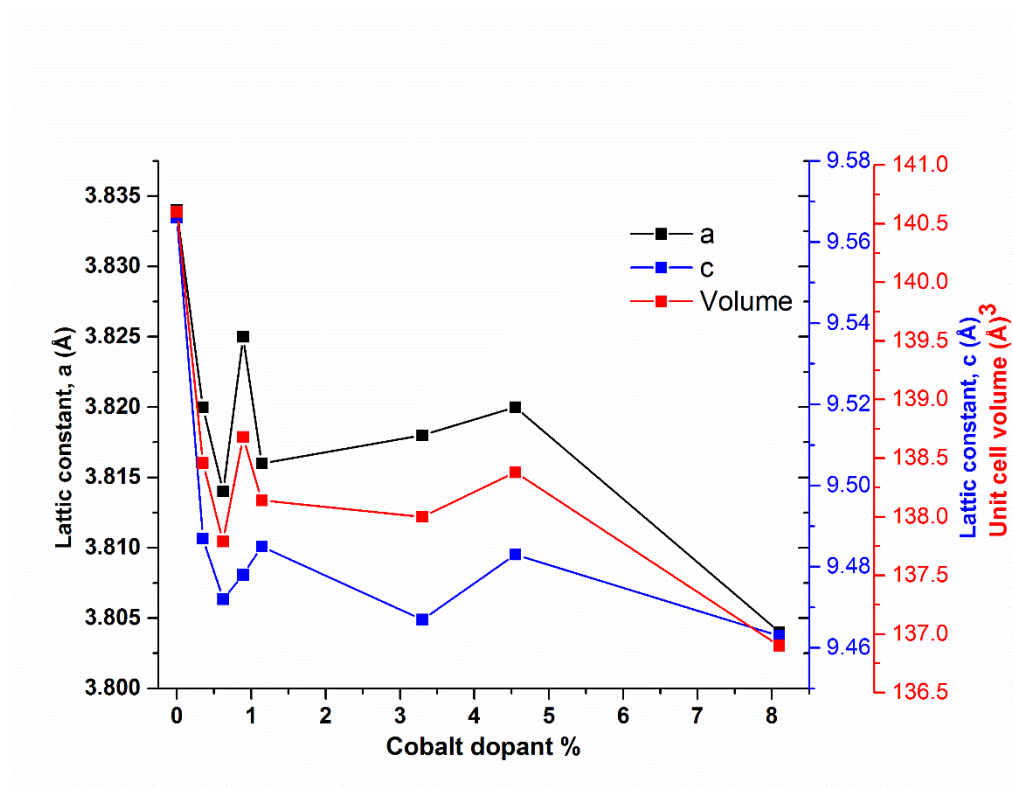

**Figure S4.** Unit cell parameters of TiO<sub>2</sub> with different cobalt-dopant percentage.



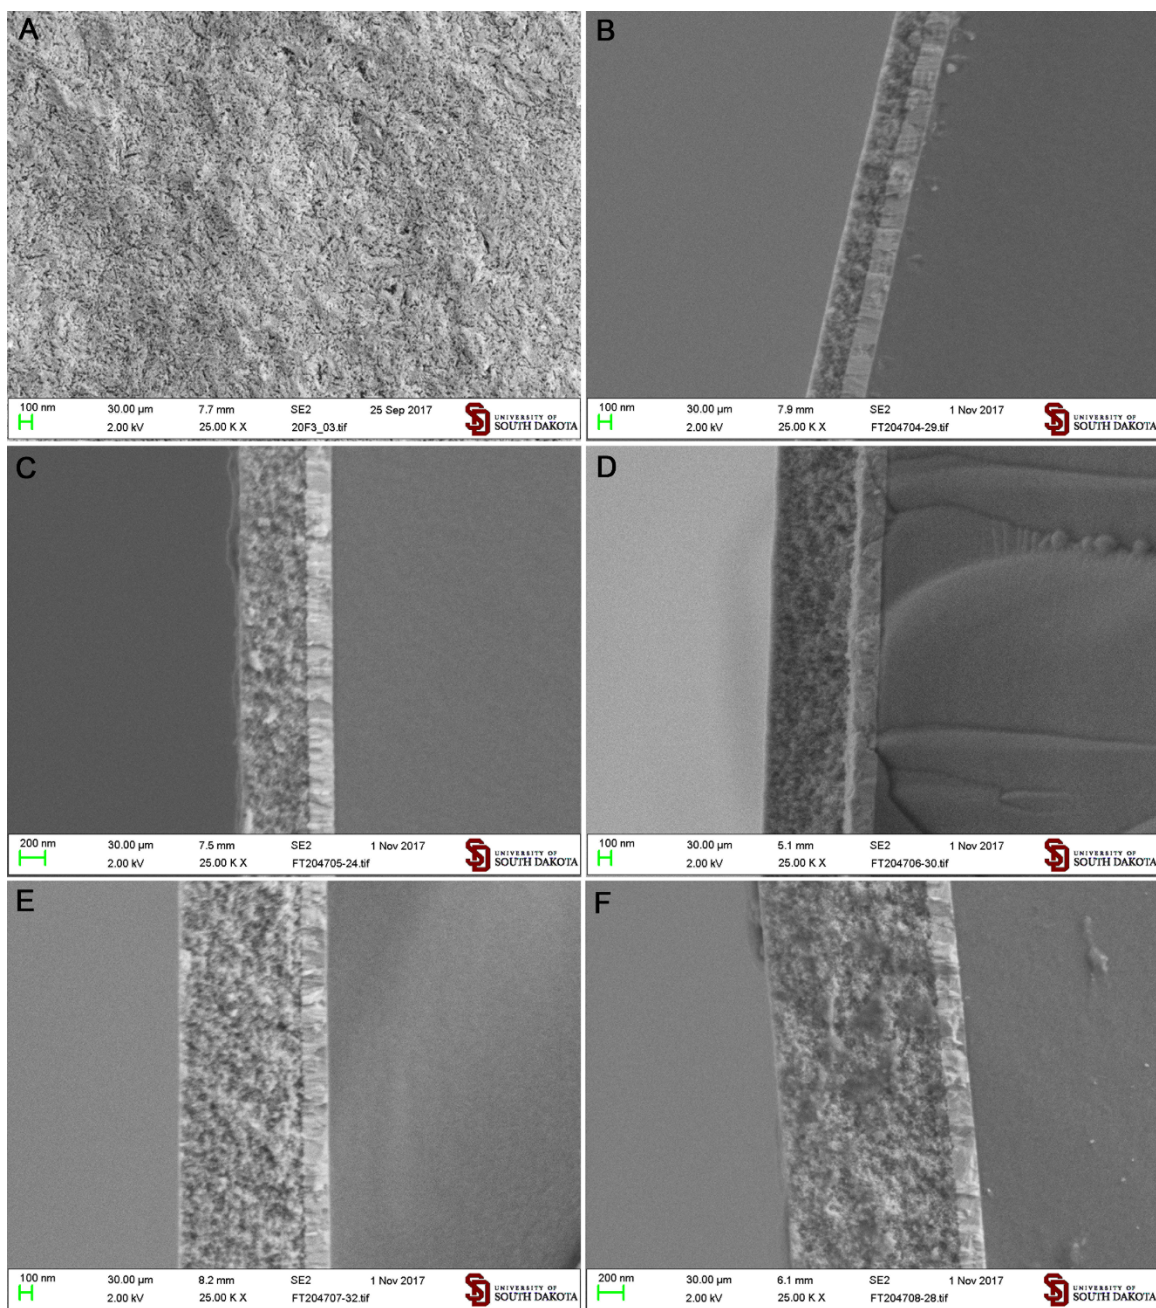

**Figure S5.** SEM images of prepared thin films with 2.83% cobalt doped  $\text{TiO}_2$  nanorods. A) Top view; Cross sectional view of B) 2 layers of film, C) 4 layers of film, D) 6 layers of film, E) 8 layers of film, F) 10 layers of film.

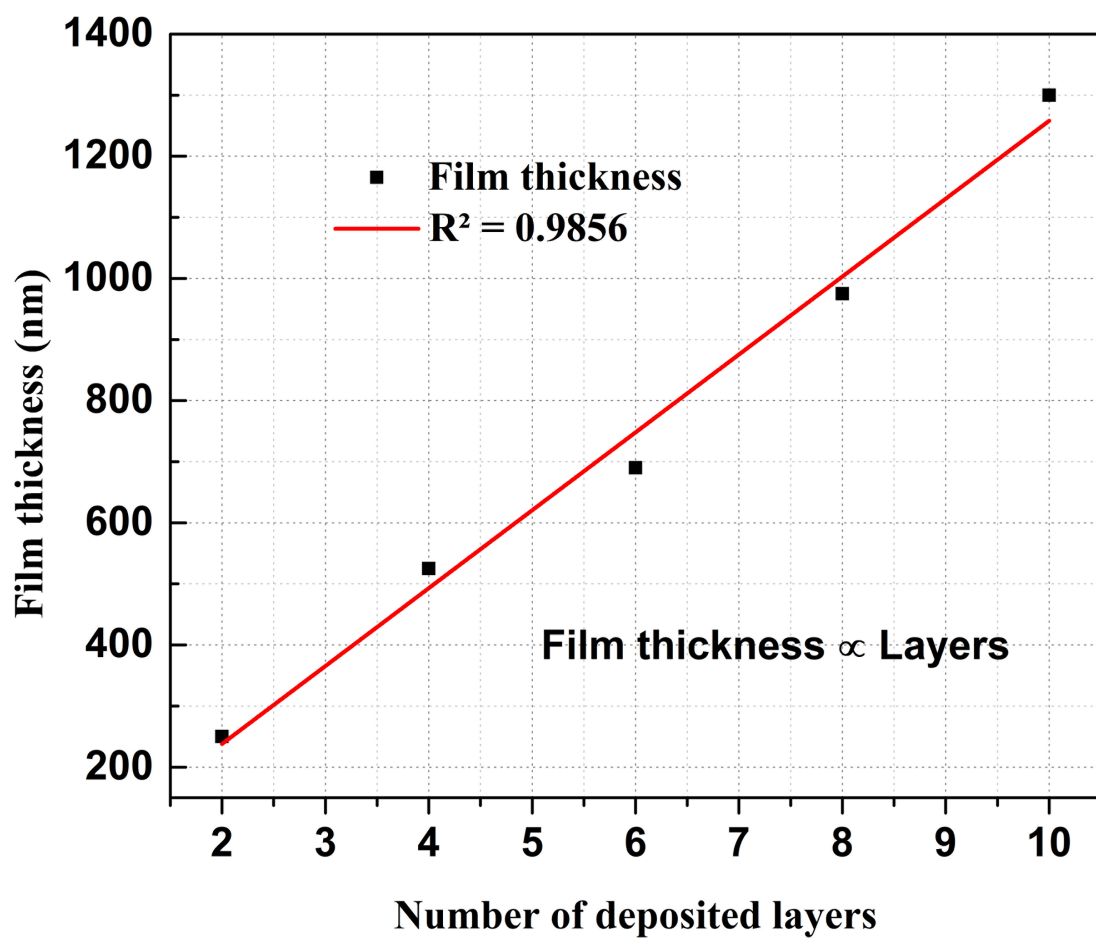

**Figure S6.** Film thickness versus number of deposition steps.
